# Supplementary material for: Impact of wildfires on the drinking water catchment for the capital area of Iceland – a case study
Source: Royal Society of Chemistry journal article supplement (doi:10.1039/d4va00352g), 2024-12-18
Supplement: d4va00352g1.pdf [file d4va00352g1.pdf]

# Supplementing information

**Paper: Impact of wildfire on the drinking water catchment for the capital area of Iceland: A case study**

**Interview on May 11, 2023, with the Metropolitan Fire Department Fire Brigade**

**Questions:**

**Sequence of events:**

1. The sequence of events on May 4, 2021
2. Data about the incident
3. Weather data used
4. Who was involved in firefighting
5. Is the cause of the fire known (man-made, lightning...)
6. Use of equipment's – use chemicals (fire-foam)
7. How was the follow-up done?

**Lessons learned:**

1. The main challenges
2. Pollution concerns from wildfire
3. How is the situation monitored
4. Improved working procedures
5. How to prevent forest fires
6. The main lessons learned
7. How to increase resilience

Table: Results from regular monitoring of 37 organic chemicals and B, Se, F and SO<sub>4</sub> (Source: ALS Scandinavia AB)

|               | Dagsetning | Eign        | B [µg/l] | Se [µg/l] | fluorid [mg/l] | sulfat [mg/l] | bensen [µg/l] | toluen [µg/l] | etylbenzen [µg/l] |
|---------------|------------|-------------|----------|-----------|----------------|---------------|---------------|---------------|-------------------|
| 1             | 22.2.2011  | V-13        | <10      | 0,204     | <0.200         | 2,07          | <0.20         | <1.0          | <0.10             |
| 2             | 16.8.2011  | VK-01       | <10      | 0,119     | <0.200         | 2             | <0.20         | <1.0          | <0.10             |
| 3             | 28.8.2012  | VK-01       | <10      | 0,212     | 0,028          | 1,86          | <0.20         | <1.00         | <0.10             |
| 4             | 19.2.2013  | V-13        | <10      | 0,13      | <0.200         | <5.00         | <0.20         | <1.00         | <0.10             |
| 5             | 2.9.2013   | VK-01       | <10      | <0.5      | <0.200         | 2,02          | <0.20         | <1.00         | <0.10             |
| 6             | 19.2.2014  | V-05        | <10      | <0.5      | <0.200         | 1,98          | <0.20         | <1.00         | <0.10             |
| 7             | 13.8.2014  | VK-01       | <10      | <0.5      | <0.200         | 1,82          | <0.20         | <0.20         | <0.20             |
| 8             | 21.4.2015  | V-13        | <10      | <0.5      | <0.200         | 1,8           | <0.20         | <0.20         | <0.20             |
| 9             | 3.5.2016   | V-05        | <10      | <0.5      | <0.200         | 2,23          | <0.20         | <0.20         | <0.10             |
| 10            | 24.10.2016 | VK-01       | <10      | <0.5      | <0.200         | 1,98          | <0.20         | <0.20         | <0.10             |
| 11            | 8.5.2018   | V-01        | <10      | <0.5      | <0.200         | 2,24          | <0.20         | <0.20         | <0.10             |
| 12            | 8.5.2018   | V-13        | <10      | <0.5      | <0.200         | 2,16          | <0.20         | <0.20         | <0.10             |
| 13            | 8.5.2018   | VK-01       | <10      | <0.5      | <0.200         | 2,11          | <0.20         | <0.20         | <0.10             |
| 14            | 17.9.2018  | VK-05       | <10      | <0.5      | <0.200         | 2,1           | <0.20         | <0.20         | <0.10             |
| 15            | 17.9.2018  | V-14        | <10      | <0.5      | <0.200         | 2,17          | <0.20         | <0.20         | <0.10             |
| 16            | 17.9.2018  | V-10        | <10      | <0.5      | <0.200         | 2,27          | <0.20         | <0.20         | <0.10             |
| 17            | 6.5.2019   | V-3         | <10      | <0.5      | <0.200         | 1,95          | <0.20         | <0.20         | <0.10             |
| 18            | 6.5.2019   | V-12        | <10      | <0.5      | <0.200         | 2             | <0.20         | <0.20         | <0.10             |
| 19            | 6.5.2019   | VK-01       | <10      | <0.5      | <0.200         | 1,99          | <0.20         | <0.20         | <0.10             |
| 20            | 16.10.2019 | VK-05       | <10      | <0.5      | <0.200         | 2,32          | <0.20         | <0.20         | <0.10             |
| 21            | 16.10.2019 | Tank Myllul | <10      | <0.5      | <0.200         | 2,46          | <0.20         | <0.20         | <0.10             |
| 22            | 16.10.2019 | V-10        | <10      | <0.5      | <0.200         | 2,4           | <0.20         | <0.20         | <0.10             |
| 23            | 6.5.2020   | VK-01       | <10      | <0.5      | <0.200         | 2,1           | <0.20         | <0.20         | <0.10             |
| 24            | 6.5.2020   | V-13        | <10      | <0.5      | <0.200         | 2,04          | <0.20         | <0.20         | <0.10             |
| 25            | 6.5.2020   | V-05        | <10      | <0.5      | <0.200         | 2,02          | <0.20         | <0.20         | <0.10             |
| 26            | 2.11.2020  | V-10        | <10      | <0.5      | <0.200         | 2,11          | <0.20         | <0.20         | <0.10             |
| 27            | 2.11.2020  | V-12        | <10      | <0.5      | <0.200         | 2,04          | <0.20         | <0.20         | <0.10             |
| 28            | 2.11.2020  | VK-05       | <10      | <0.5      | <0.200         | 1,95          | <0.20         | <0.20         | <0.10             |
| 29            | 11.5.2021  | VK-01       | <10      | 0,378     | <0.200         | <5.00         | <0.20         | <0.20         | <0.10             |
| 30            | 11.5.2021  | V-04        | <10      | 0,316     | <0.200         | <5.00         | <0.20         | <0.20         | <0.10             |
| 31            | 11.5.2021  | V-19        | <10      | 0,314     | <0.200         | <5.00         | <0.20         | <0.20         | <0.10             |
| 32            | 25.5.2021  | DN Laxalón  | <10      | <0.3      | <0.200         | <5.00         | <0.20         | <0.20         | 0,21              |
| 33            | 19.10.2021 | V-3         | <10      | <0.3      | <0.200         | <5.00         | <0.20         | <0.20         | <0.10             |
| 34            | 19.10.2021 | V-13        | <10      | <0.3      | <0.200         | <5.00         | <0.20         | <0.20         | <0.10             |
| 35            | 19.10.2021 | VK-02       | <10      | <0.3      | <0.200         | <5.00         | <0.20         | <0.20         | <0.10             |
| 36            | 10.5.2022  | V-01        | <10      | <0.3      | <0.200         | <5.00         | <0.2          | <0.2          | <0.2              |
| 37            | 10.5.2022  | V-13        | <10      | <0.3      | <0.200         | <5.00         | <0.2          | <0.2          | <0.2              |
| 38            | 10.5.2022  | VK-1        | <10      | <0.3      | <0.200         | <5.00         | <0.2          | <0.2          | <0.2              |
| 39            | 18.10.2022 | V-23        | <10      | <0.3      | <2.00          | <6.00         | <0.2          | 0,5           | <0.2              |
| 40            | 18.10.2022 | V-5         | <10      | <0.3      | <2.00          | <6.00         | <0.2          | 0,5           | <0.2              |
| 41            | 18.10.2022 | VK-5        | <10      | <0.3      | <2.00          | <6.00         | <0.2          | 0,5           | <0.2              |
| 42            | 9.5.2023   | VK-1        | <10      | <0.3      | <0.200         | <5.00         | <0.2          | <0.2          | <0.2              |
| 43            | 9.5.2023   | V-12        | <10      | <0.3      | <0.200         | <5.00         | <0.2          | <0.2          | <0.2              |
| 44            | 9.5.2023   | V-01        | <10      | <0.3      | <0.200         | <5.00         | <0.2          | <0.2          | <0.2              |
| 45            | 17.10.2023 | VK-2        | <10      | <0.3      | <0.200         | <5.00         | <0.2          | <0.2          | <0.2              |
| 46            | 17.10.2023 | V-23        | <10      | <0.3      | <0.200         | <5.00         | <0.2          | <0.2          | <0.2              |
| 47            | 17.10.2023 | V-04        | <10      | <0.3      | <0.200         | <5.00         | <0.2          | <0.2          | <0.2              |
| Count over DL |            |             | 0        | 7         | 1              | 27            | 0             | 3             | 1                 |



Table: Results from regular monitoring of 37 organic chemicals and B, Se, F and SO<sub>4</sub> (Source: ALS Scandinavia AB)

|               | Dagsetning | Eign        | xylenar,<br>summa<br>[µg/l] | diklormeta<br>n [µg/l] | 1,1-<br>dikloreten<br>[µg/l] | 1,2-<br>dikloreten<br>[µg/l] | trans-1,2-<br>dikloreten<br>[µg/l] | cis-1,2-<br>dikloreten<br>[µg/l] |
|---------------|------------|-------------|-----------------------------|------------------------|------------------------------|------------------------------|------------------------------------|----------------------------------|
| 1             | 22.2.2011  | V-13        | <0.20                       | <2.0                   | <0.10                        | <1.0                         | <0.10                              | <0.10                            |
| 2             | 16.8.2011  | VK-01       | <0.20                       | <2.0                   | <0.10                        | <1.0                         | <0.10                              | <0.10                            |
| 3             | 28.8.2012  | VK-01       | <0.15                       | <2.0                   | <0.10                        | <1.00                        | <0.10                              | <0.10                            |
| 4             | 19.2.2013  | V-13        | <0.15                       | <2.0                   | <0.10                        | <0.50                        | <0.10                              | <0.10                            |
| 5             | 2.9.2013   | VK-01       | <0.15                       | <2.0                   | <0.10                        | <0.50                        | <0.10                              | <0.10                            |
| 6             | 19.2.2014  | V-05        | <0.15                       | <2.0                   | <0.10                        | <0.50                        | <0.10                              | <0.10                            |
| 7             | 13.8.2014  | VK-01       | <0.20                       | <2.0                   | <0.10                        | <0.10                        | <0.10                              | <0.10                            |
| 8             | 21.4.2015  | V-13        | <0.20                       | <2.0                   | <0.10                        | <0.10                        | <0.10                              | <0.10                            |
| 9             | 3.5.2016   | V-05        | <0.20                       | <2.0                   | <0.10                        | <0.50                        | <0.10                              | <0.10                            |
| 10            | 24.10.2016 | VK-01       | <0.20                       | <2.0                   | <0.10                        | <0.50                        | <0.10                              | <0.10                            |
| 11            | 8.5.2018   | V-01        | <0.15                       | <2.0                   | <0.10                        | <0.50                        | <0.10                              | <0.10                            |
| 12            | 8.5.2018   | V-13        | <0.15                       | <2.0                   | <0.10                        | <0.50                        | <0.10                              | <0.10                            |
| 13            | 8.5.2018   | VK-01       | <0.15                       | <2.0                   | <0.10                        | <0.50                        | <0.10                              | <0.10                            |
| 14            | 17.9.2018  | VK-05       | <0.15                       | <2.0                   | <0.10                        | <0.50                        | <0.10                              | <0.10                            |
| 15            | 17.9.2018  | V-14        | <0.15                       | <2.0                   | <0.10                        | <0.50                        | <0.10                              | <0.10                            |
| 16            | 17.9.2018  | V-10        | <0.15                       | <2.0                   | <0.10                        | <0.50                        | <0.10                              | <0.10                            |
| 17            | 6.5.2019   | V-3         | <0.15                       | <2.0                   | <0.10                        | <0.50                        | <0.10                              | <0.10                            |
| 18            | 6.5.2019   | V-12        | <0.15                       | <2.0                   | <0.10                        | <0.50                        | <0.10                              | <0.10                            |
| 19            | 6.5.2019   | VK-01       | <0.15                       | <2.0                   | <0.10                        | <0.50                        | <0.10                              | <0.10                            |
| 20            | 16.10.2019 | VK-05       | <0.15                       | <2.0                   | <0.10                        | <0.50                        | <0.10                              | <0.10                            |
| 21            | 16.10.2019 | Tank Myllul | <0.15                       | <2.0                   | <0.10                        | <0.50                        | <0.10                              | <0.10                            |
| 22            | 16.10.2019 | V-10        | <0.15                       | <2.0                   | <0.10                        | <0.50                        | <0.10                              | <0.10                            |
| 23            | 6.5.2020   | VK-01       | <0.15                       | <2.0                   | <0.10                        | <0.50                        | <0.10                              | <0.10                            |
| 24            | 6.5.2020   | V-13        | <0.15                       | <2.0                   | <0.10                        | <0.50                        | <0.10                              | <0.10                            |
| 25            | 6.5.2020   | V-05        | <0.15                       | <2.0                   | <0.10                        | <0.50                        | <0.10                              | <0.10                            |
| 26            | 2.11.2020  | V-10        | <0.15                       | <2.0                   | <0.10                        | <0.50                        | <0.10                              | <0.10                            |
| 27            | 2.11.2020  | V-12        | <0.15                       | <2.0                   | <0.10                        | <0.50                        | <0.10                              | <0.10                            |
| 28            | 2.11.2020  | VK-05       | <0.15                       | <2.0                   | <0.10                        | <0.50                        | <0.10                              | <0.10                            |
| 29            | 11.5.2021  | VK-01       |                             | <0.10                  | <0.020                       | <0.020                       | <0.020                             | 0,045                            |
| 30            | 11.5.2021  | V-04        |                             | <0.10                  | <0.020                       | <0.020                       | <0.020                             | <0.020                           |
| 31            | 11.5.2021  | V-19        |                             | <0.10                  | <0.020                       | <0.020                       | <0.020                             | <0.020                           |
| 32            | 25.5.2021  | DN Laxalón  |                             | <0.10                  | <0.020                       | <0.020                       | <0.020                             | <0.020                           |
| 33            | 19.10.2021 | V-3         | <0.150                      | <0.10                  | <0.020                       | <0.020                       | <0.020                             | <0.020                           |
| 34            | 19.10.2021 | V-13        | <0.150                      | 0,9                    | <0.020                       | <0.020                       | <0.020                             | <0.020                           |
| 35            | 19.10.2021 | VK-02       | <0.150                      | <0.10                  | <0.020                       | <0.020                       | <0.020                             | <0.020                           |
| 36            | 10.5.2022  | V-01        | <0.2                        | <0.10                  | <0.020                       | <0.020                       | <0.020                             | <0.020                           |
| 37            | 10.5.2022  | V-13        | <0.2                        | <0.10                  | <0.020                       | <0.020                       | <0.020                             | <0.020                           |
| 38            | 10.5.2022  | VK-1        | <0.2                        | <0.10                  | <0.020                       | <0.020                       | <0.020                             | <0.020                           |
| 39            | 18.10.2022 | V-23        | 0,7                         | <0.10                  | <0.020                       | <0.020                       | <0.020                             | <0.020                           |
| 40            | 18.10.2022 | V-5         | 0,8                         | <0.10                  | <0.020                       | <0.020                       | <0.020                             | <0.020                           |
| 41            | 18.10.2022 | VK-5        | 0,6                         | <0.10                  | <0.020                       | <0.020                       | <0.020                             | <0.020                           |
| 42            | 9.5.2023   | VK-1        | <0.2                        | <0.1                   | <0.1                         | <0.1                         | <0.1                               | <0.1                             |
| 43            | 9.5.2023   | V-12        | <0.2                        | <0.1                   | <0.1                         | <0.1                         | <0.1                               | <0.1                             |
| 44            | 9.5.2023   | V-01        | <0.2                        | <0.1                   | <0.1                         | <0.1                         | <0.1                               | <0.1                             |
| 45            | 17.10.2023 | VK-2        | <0.2                        | <0.1                   | <0.1                         | <0.1                         | <0.1                               | <0.1                             |
| 46            | 17.10.2023 | V-23        | <0.2                        | <0.1                   | <0.1                         | <0.1                         | <0.1                               | <0.1                             |
| 47            | 17.10.2023 | V-04        | <0.2                        | <0.1                   | <0.1                         | <0.1                         | <0.1                               | <0.1                             |
| Count over DL |            |             | 3                           | 1                      | 0                            | 0                            | 0                                  | 1                                |



Table: Results from regular monitoring of 37 organic chemicals and B, Se, F and SO<sub>4</sub> (Source: ALS Scandinavia AB)

|               | Dagsetning | Eign        | 1,2-diklorpropa<br>n [µg/l] | tetraklorme<br>tan [µg/l] | 1,1,1-<br>trikloreten<br>[µg/l] | 1,1,2-<br>trikloreten<br>[µg/l] | trikloreten<br>[µg/l] | tetraklorete<br>n [µg/l] |
|---------------|------------|-------------|-----------------------------|---------------------------|---------------------------------|---------------------------------|-----------------------|--------------------------|
| 1             | 22.2.2011  | V-13        | <1.0                        | <0.10                     | <0.10                           | <0.20                           | <0.10                 | <0.20                    |
| 2             | 16.8.2011  | VK-01       | <1.0                        | <0.10                     | <0.10                           | <0.20                           | <0.10                 | <0.20                    |
| 3             | 28.8.2012  | VK-01       | <1.0                        | <0.10                     | <0.10                           | <0.20                           | <0.10                 | <0.20                    |
| 4             | 19.2.2013  | V-13        | <1.0                        | <0.10                     | <0.10                           | <0.20                           | <0.10                 | <0.20                    |
| 5             | 2.9.2013   | VK-01       | <1.0                        | <0.10                     | <0.10                           | <0.20                           | <0.10                 | <0.20                    |
| 6             | 19.2.2014  | V-05        | <1.0                        | <0.10                     | <0.10                           | <0.20                           | <0.10                 | <0.20                    |
| 7             | 13.8.2014  | VK-01       | <1.0                        | <0.10                     | <0.10                           | <0.20                           | <0.10                 | <0.20                    |
| 8             | 21.4.2015  | V-13        | <1.0                        | <0.10                     | <0.10                           | <0.20                           | <0.10                 | <0.20                    |
| 9             | 3.5.2016   | V-05        | <1.0                        | <0.10                     | <0.10                           | <0.20                           | <0.10                 | <0.20                    |
| 10            | 24.10.2016 | VK-01       | <1.0                        | <0.10                     | <0.10                           | <0.20                           | <0.10                 | <0.20                    |
| 11            | 8.5.2018   | V-01        | <1.0                        | <0.10                     | <0.10                           | <0.20                           | <0.10                 | <0.20                    |
| 12            | 8.5.2018   | V-13        | <1.0                        | <0.10                     | <0.10                           | <0.20                           | <0.10                 | <0.20                    |
| 13            | 8.5.2018   | VK-01       | <1.0                        | <0.10                     | <0.10                           | <0.20                           | <0.10                 | <0.20                    |
| 14            | 17.9.2018  | VK-05       | <1.0                        | <0.10                     | <0.10                           | <0.20                           | <0.10                 | <0.20                    |
| 15            | 17.9.2018  | V-14        | <1.0                        | <0.10                     | <0.10                           | <0.20                           | <0.10                 | <0.20                    |
| 16            | 17.9.2018  | V-10        | <1.0                        | <0.10                     | <0.10                           | <0.20                           | <0.10                 | <0.20                    |
| 17            | 6.5.2019   | V-3         | <1.0                        | <0.10                     | <0.10                           | <0.20                           | 0,21                  | <0.20                    |
| 18            | 6.5.2019   | V-12        | <1.0                        | <0.10                     | <0.10                           | <0.20                           | 0,18                  | <0.20                    |
| 19            | 6.5.2019   | VK-01       | <1.0                        | <0.10                     | <0.10                           | <0.20                           | 0,16                  | <0.20                    |
| 20            | 16.10.2019 | VK-05       | <1.0                        | <0.10                     | <0.10                           | <0.20                           | <0.10                 | <0.20                    |
| 21            | 16.10.2019 | Tank Myllul | <1.0                        | <0.10                     | <0.10                           | <0.20                           | <0.10                 | <0.20                    |
| 22            | 16.10.2019 | V-10        | <1.0                        | <0.10                     | <0.10                           | <0.20                           | <0.10                 | <0.20                    |
| 23            | 6.5.2020   | VK-01       | <1.0                        | <0.10                     | <0.10                           | <0.20                           | <0.10                 | <0.20                    |
| 24            | 6.5.2020   | V-13        | <1.0                        | <0.10                     | <0.10                           | <0.20                           | <0.10                 | <0.20                    |
| 25            | 6.5.2020   | V-05        | <1.0                        | <0.10                     | <0.10                           | <0.20                           | <0.10                 | <0.20                    |
| 26            | 2.11.2020  | V-10        | <1.0                        | <0.10                     | <0.10                           | <0.20                           | <0.10                 | <0.20                    |
| 27            | 2.11.2020  | V-12        | <1.0                        | <0.10                     | <0.10                           | <0.20                           | <0.10                 | <0.20                    |
| 28            | 2.11.2020  | VK-05       | <1.0                        | <0.10                     | <0.10                           | <0.20                           | <0.10                 | <0.20                    |
| 29            | 11.5.2021  | VK-01       | <0.020                      | <0.020                    | <0.020                          | <0.020                          | <0.020                | <0.020                   |
| 30            | 11.5.2021  | V-04        | <0.020                      | <0.020                    | <0.020                          | <0.020                          | <0.020                | <0.020                   |
| 31            | 11.5.2021  | V-19        | <0.020                      | <0.020                    | <0.020                          | <0.020                          | <0.020                | <0.020                   |
| 32            | 25.5.2021  | DN Laxalón  | <0.020                      | <0.020                    | <0.020                          | <0.020                          | <0.020                | <0.020                   |
| 33            | 19.10.2021 | V-3         | <0.020                      | <0.020                    | <0.020                          | <0.020                          | <0.020                | <0.020                   |
| 34            | 19.10.2021 | V-13        | <0.020                      | <0.020                    | <0.020                          | <0.020                          | <0.020                | <0.020                   |
| 35            | 19.10.2021 | VK-02       | <0.020                      | <0.020                    | <0.020                          | <0.020                          | <0.020                | <0.020                   |
| 36            | 10.5.2022  | V-01        | <0.020                      | <0.020                    | <0.020                          | <0.020                          | <0.020                | <0.020                   |
| 37            | 10.5.2022  | V-13        | <0.020                      | <0.020                    | <0.020                          | <0.020                          | <0.020                | <0.020                   |
| 38            | 10.5.2022  | VK-1        | <0.020                      | <0.020                    | <0.020                          | <0.020                          | <0.020                | <0.020                   |
| 39            | 18.10.2022 | V-23        | <0.020                      | <0.020                    | <0.020                          | <0.020                          | <0.020                | <0.020                   |
| 40            | 18.10.2022 | V-5         | <0.020                      | <0.020                    | <0.020                          | <0.020                          | <0.020                | <0.020                   |
| 41            | 18.10.2022 | VK-5        | <0.020                      | <0.020                    | <0.020                          | <0.020                          | <0.020                | <0.020                   |
| 42            | 9.5.2023   | VK-1        | <0.1                        | <0.1                      | <0.1                            | <0.1                            | <0.1                  | <0.1                     |
| 43            | 9.5.2023   | V-12        | <0.1                        | <0.1                      | <0.1                            | <0.1                            | <0.1                  | <0.1                     |
| 44            | 9.5.2023   | V-01        | <0.1                        | <0.1                      | <0.1                            | <0.1                            | <0.1                  | <0.1                     |
| 45            | 17.10.2023 | VK-2        | <0.1                        | <0.1                      | <0.1                            | <0.1                            | <0.1                  | <0.1                     |
| 46            | 17.10.2023 | V-23        | <0.1                        | <0.1                      | <0.1                            | <0.1                            | <0.1                  | <0.1                     |
| 47            | 17.10.2023 | V-04        | <0.1                        | <0.1                      | <0.1                            | <0.1                            | <0.1                  | <0.1                     |
| Count over DL |            |             | 0                           | 0                         | 0                               | 0                               | 3                     | 0                        |



Table: Results from regular monitoring of 37 organic chemicals and B, Se, F and SO<sub>4</sub> (Source: ALS Scandinavia AB)

|               | Dagsetning | Eign        | vinyklorid<br>[µg/l] | 1,1-<br>dikloreten<br>[µg/l] | naftalen<br>[µg/l] | acenaftilen<br>[µg/l] | acenaften<br>[µg/l] | fluoren<br>[µg/l] |
|---------------|------------|-------------|----------------------|------------------------------|--------------------|-----------------------|---------------------|-------------------|
| 1             | 22.2.2011  | V-13        | <1.00                |                              | <0.20              | <0.10                 | <0.0070             | <0.010            |
| 2             | 16.8.2011  | VK-01       | <1.00                |                              | <0.20              | <0.10                 | <0.0070             | <0.010            |
| 3             | 28.8.2012  | VK-01       | <1.00                |                              | <0.20              | <0.10                 | <0.0070             | <0.010            |
| 4             | 19.2.2013  | V-13        | <1.0                 |                              | <0.20              | <0.10                 | <0.0070             | <0.010            |
| 5             | 2.9.2013   | VK-01       | <1.0                 |                              | <0.20              | <0.10                 | <0.0070             | <0.010            |
| 6             | 19.2.2014  | V-05        | <1.0                 |                              | <0.20              | <0.10                 | <0.0070             | <0.010            |
| 7             | 13.8.2014  | VK-01       | <1.0                 |                              | <0.20              | <0.10                 | <0.0070             | <0.010            |
| 8             | 21.4.2015  | V-13        | <1.0                 |                              | <0.20              | <0.10                 | <0.0070             | <0.010            |
| 9             | 3.5.2016   | V-05        | <1.0                 |                              | <0.20              | <0.10                 | <0.0070             | <0.010            |
| 10            | 24.10.2016 | VK-01       | <1.0                 | <0.10                        | <0.20              | <0.10                 | <0.0070             | <0.010            |
| 11            | 8.5.2018   | V-01        | <1.0                 | <0.10                        | <0.20              | <0.10                 | <0.0070             | <0.010            |
| 12            | 8.5.2018   | V-13        | <1.0                 | <0.10                        | <0.20              | <0.10                 | <0.0070             | <0.010            |
| 13            | 8.5.2018   | VK-01       | <1.0                 | <0.10                        | <0.20              | <0.10                 | <0.0070             | <0.010            |
| 14            | 17.9.2018  | VK-05       | <1.0                 | <0.10                        | <0.20              | <0.10                 | <0.0070             | <0.010            |
| 15            | 17.9.2018  | V-14        | <1.0                 | <0.10                        | <0.20              | <0.10                 | <0.0070             | <0.010            |
| 16            | 17.9.2018  | V-10        | <1.0                 | <0.10                        | <0.20              | <0.10                 | <0.0070             | <0.010            |
| 17            | 6.5.2019   | V-3         | <1.0                 | <0.10                        | <0.20              | <0.10                 | <0.0070             | <0.010            |
| 18            | 6.5.2019   | V-12        | <1.0                 | <0.10                        | <0.20              | <0.10                 | <0.0070             | <0.010            |
| 19            | 6.5.2019   | VK-01       | <1.0                 | <0.10                        | <0.20              | <0.10                 | <0.0070             | <0.010            |
| 20            | 16.10.2019 | VK-05       | <1.0                 | <0.10                        | <0.20              | <0.10                 | <0.0070             | <0.010            |
| 21            | 16.10.2019 | Tank Myllul | <1.0                 | <0.10                        | <0.20              | <0.10                 | <0.0070             | <0.010            |
| 22            | 16.10.2019 | V-10        | <1.0                 | <0.10                        | <0.20              | <0.10                 | <0.0070             | <0.010            |
| 23            | 6.5.2020   | VK-01       | <1.0                 | <0.10                        | <0.20              | <0.10                 | <0.0070             | <0.010            |
| 24            | 6.5.2020   | V-13        | <1.0                 | <0.10                        | <0.20              | <0.10                 | <0.0070             | <0.010            |
| 25            | 6.5.2020   | V-05        | <1.0                 | <0.10                        | <0.20              | <0.10                 | <0.0070             | <0.010            |
| 26            | 2.11.2020  | V-10        | <1.0                 | <0.10                        | <0.20              | <0.10                 | <0.0070             | <0.010            |
| 27            | 2.11.2020  | V-12        | <1.0                 | <0.10                        | <0.20              | <0.10                 | <0.0070             | <0.010            |
| 28            | 2.11.2020  | VK-05       | <1.0                 | <0.10                        | <0.20              | <0.10                 | <0.0070             | <0.010            |
| 29            | 11.5.2021  | VK-01       | <0.020               | <0.020                       | 0,0011             | <0.0010               | <0.0010             | <0.0010           |
| 30            | 11.5.2021  | V-04        | <0.020               | <0.020                       | 0,0011             | <0.0010               | <0.0010             | <0.0010           |
| 31            | 11.5.2021  | V-19        | <0.020               | <0.020                       | 0,0012             | <0.0010               | <0.0010             | <0.0010           |
| 32            | 25.5.2021  | DN Laxalón  | <0.020               | <0.020                       | <0.0010            | <0.0010               | <0.0010             | <0.0010           |
| 33            | 19.10.2021 | V-3         | <0.020               | <0.020                       | <0.0010            | <0.0010               | <0.0010             | <0.0010           |
| 34            | 19.10.2021 | V-13        | <0.020               | <0.020                       | <0.0010            | <0.0010               | <0.0010             | <0.0010           |
| 35            | 19.10.2021 | VK-02       | <0.020               | <0.020                       | 0,0011             | <0.0010               | <0.0010             | <0.0010           |
| 36            | 10.5.2022  | V-01        | <0.020               | <0.020                       | <0.0070            | <0.0010               | <0.0010             | <0.0010           |
| 37            | 10.5.2022  | V-13        | <0.020               | <0.020                       | <0.0070            | <0.0010               | <0.0010             | <0.0010           |
| 38            | 10.5.2022  | VK-1        | <0.020               | <0.020                       | <0.0070            | <0.0010               | <0.0010             | <0.0010           |
| 39            | 18.10.2022 | V-23        | <0.020               | <0.020                       | <0.0070            | <0.0010               | <0.0010             | <0.0010           |
| 40            | 18.10.2022 | V-5         | <0.020               | <0.020                       | <0.0070            | <0.0010               | <0.0010             | <0.0010           |
| 41            | 18.10.2022 | VK-5        | <0.020               | <0.020                       | <0.0070            | <0.0010               | <0.0010             | <0.0010           |
| 42            | 9.5.2023   | VK-1        | <0.1                 | <0.1                         | <0.0070            | <0.0010               | <0.0010             | <0.0010           |
| 43            | 9.5.2023   | V-12        | <0.1                 | <0.1                         | <0.0070            | <0.0010               | <0.0010             | <0.0010           |
| 44            | 9.5.2023   | V-01        | <0.1                 | <0.1                         | <0.0070            | <0.0010               | <0.0010             | <0.0010           |
| 45            | 17.10.2023 | VK-2        | <0.1                 | <0.1                         | <0.0070            | <0.0010               | <0.0010             | <0.0010           |
| 46            | 17.10.2023 | V-23        | <0.1                 | <0.1                         | <0.0070            | <0.0010               | <0.0010             | <0.0010           |
| 47            | 17.10.2023 | V-04        | <0.1                 | <0.1                         | <0.0070            | <0.0010               | <0.0010             | <0.0010           |
| Count over DL |            |             | 0                    | 0                            | 4                  | 0                     | 0                   | 0                 |



Table: Results from regular monitoring of 37 organic chemicals and B, Se, F and SO<sub>4</sub> (Source: ALS Scandinavia AB)

|               | Dagsetning | Eign        | fenantren<br>[µg/l] | antracen<br>[µg/l] | fluoranten<br>[µg/l] | pyren [µg/l] | bens(a)antr<br>acen [µg/l] | krysen [µg/l] |
|---------------|------------|-------------|---------------------|--------------------|----------------------|--------------|----------------------------|---------------|
| 1             | 22.2.2011  | V-13        | <0.040              | <0.0050            | <0.0050              | <0.0050      | <0.0030                    | <0.0070       |
| 2             | 16.8.2011  | VK-01       | <0.040              | <0.0050            | <0.0050              | <0.0050      | <0.0030                    | <0.0070       |
| 3             | 28.8.2012  | VK-01       | <0.040              | <0.0050            | <0.0050              | <0.0050      | <0.0030                    | <0.0070       |
| 4             | 19.2.2013  | V-13        | <0.040              | <0.0050            | <0.0050              | <0.0050      | <0.0030                    | <0.0070       |
| 5             | 2.9.2013   | VK-01       | <0.040              | <0.0050            | <0.0050              | <0.0050      | <0.0030                    | <0.0070       |
| 6             | 19.2.2014  | V-05        | <0.040              | <0.0050            | <0.0050              | <0.0050      | <0.0030                    | <0.0070       |
| 7             | 13.8.2014  | VK-01       | <0.040              | <0.0050            | <0.0050              | <0.0050      | <0.0030                    | <0.0070       |
| 8             | 21.4.2015  | V-13        | <0.040              | <0.0050            | <0.0050              | <0.0050      | <0.0030                    | <0.0070       |
| 9             | 3.5.2016   | V-05        | <0.040              | <0.0050            | <0.0050              | <0.0050      | <0.0030                    | <0.0070       |
| 10            | 24.10.2016 | VK-01       | <0.040              | <0.0050            | <0.0050              | <0.0050      | <0.0030                    | <0.0070       |
| 11            | 8.5.2018   | V-01        | <0.040              | <0.0050            | <0.0050              | <0.0050      | <0.0030                    | <0.0070       |
| 12            | 8.5.2018   | V-13        | <0.040              | <0.0050            | <0.0050              | <0.0050      | <0.0030                    | <0.0070       |
| 13            | 8.5.2018   | VK-01       | <0.040              | <0.0050            | <0.0050              | <0.0050      | <0.0030                    | <0.0070       |
| 14            | 17.9.2018  | VK-05       | <0.040              | <0.0050            | <0.0050              | <0.0050      | <0.0030                    | <0.0070       |
| 15            | 17.9.2018  | V-14        | <0.040              | <0.0050            | <0.0050              | <0.0050      | <0.0030                    | <0.0070       |
| 16            | 17.9.2018  | V-10        | <0.040              | <0.0050            | <0.0050              | <0.0050      | <0.0030                    | <0.0070       |
| 17            | 6.5.2019   | V-3         | <0.040              | <0.0050            | <0.0050              | <0.0050      | <0.0030                    | <0.0070       |
| 18            | 6.5.2019   | V-12        | <0.040              | <0.0050            | <0.0050              | <0.0050      | <0.0030                    | <0.0070       |
| 19            | 6.5.2019   | VK-01       | <0.040              | <0.0050            | <0.0050              | <0.0050      | <0.0030                    | <0.0070       |
| 20            | 16.10.2019 | VK-05       | <0.040              | <0.0050            | <0.0050              | <0.0050      | <0.0030                    | <0.0070       |
| 21            | 16.10.2019 | Tank Myllul | <0.040              | <0.0050            | <0.0050              | <0.0050      | <0.0030                    | <0.0070       |
| 22            | 16.10.2019 | V-10        | <0.040              | <0.0050            | <0.0050              | <0.0050      | <0.0030                    | <0.0070       |
| 23            | 6.5.2020   | VK-01       | <0.040              | <0.0050            | <0.0050              | <0.0050      | <0.0030                    | <0.0070       |
| 24            | 6.5.2020   | V-13        | <0.040              | <0.0050            | <0.0050              | <0.0050      | <0.0030                    | <0.0070       |
| 25            | 6.5.2020   | V-05        | <0.040              | <0.0050            | <0.0050              | <0.0050      | <0.0030                    | <0.0070       |
| 26            | 2.11.2020  | V-10        | <0.040              | <0.0050            | <0.0050              | <0.0050      | <0.0030                    | <0.0070       |
| 27            | 2.11.2020  | V-12        | <0.040              | <0.0050            | <0.0050              | <0.0050      | <0.0030                    | <0.0070       |
| 28            | 2.11.2020  | VK-05       | <0.040              | <0.0050            | <0.0050              | <0.0050      | <0.0030                    | <0.0070       |
| 29            | 11.5.2021  | VK-01       | <0.0010             | <0.0010            | <0.0010              | <0.0010      | <0.0010                    | <0.0010       |
| 30            | 11.5.2021  | V-04        | <0.0010             | <0.0010            | <0.0010              | <0.0010      | <0.0010                    | <0.0010       |
| 31            | 11.5.2021  | V-19        | 0,0012              | <0.0010            | <0.0010              | <0.0010      | <0.0010                    | <0.0010       |
| 32            | 25.5.2021  | DN Laxalón  | <0.0010             | <0.0010            | <0.0010              | <0.0010      | <0.0010                    | <0.0010       |
| 33            | 19.10.2021 | V-3         | <0.0010             | <0.0010            | <0.0010              | <0.0010      | <0.0010                    | <0.0010       |
| 34            | 19.10.2021 | V-13        | <0.0010             | <0.0010            | <0.0010              | <0.0010      | <0.0010                    | <0.0010       |
| 35            | 19.10.2021 | VK-02       | <0.0010             | <0.0010            | <0.0010              | <0.0010      | <0.0010                    | <0.0010       |
| 36            | 10.5.2022  | V-01        | <0.0010             | <0.0010            | <0.0010              | <0.0010      | <0.0010                    | <0.0010       |
| 37            | 10.5.2022  | V-13        | <0.0010             | <0.0010            | <0.0010              | <0.0010      | <0.0010                    | <0.0010       |
| 38            | 10.5.2022  | VK-1        | <0.0010             | <0.0010            | <0.0010              | <0.0010      | <0.0010                    | <0.0010       |
| 39            | 18.10.2022 | V-23        | <0.0010             | <0.0010            | <0.0010              | <0.0010      | <0.0010                    | <0.0010       |
| 40            | 18.10.2022 | V-5         | <0.0010             | <0.0010            | <0.0010              | <0.0010      | <0.0010                    | <0.0010       |
| 41            | 18.10.2022 | VK-5        | <0.0010             | <0.0010            | <0.0010              | <0.0010      | <0.0010                    | <0.0010       |
| 42            | 9.5.2023   | VK-1        | <0.0010             | <0.0010            | <0.0010              | <0.0010      | <0.0010                    | <0.0010       |
| 43            | 9.5.2023   | V-12        | <0.0010             | <0.0010            | <0.0010              | <0.0010      | <0.0010                    | <0.0010       |
| 44            | 9.5.2023   | V-01        | <0.0010             | <0.0010            | <0.0010              | <0.0010      | <0.0010                    | <0.0010       |
| 45            | 17.10.2023 | VK-2        | <0.0010             | <0.0010            | <0.0010              | <0.0010      | <0.0010                    | <0.0010       |
| 46            | 17.10.2023 | V-23        | <0.0010             | <0.0010            | <0.0010              | <0.0010      | <0.0010                    | <0.0010       |
| 47            | 17.10.2023 | V-04        | <0.0010             | <0.0010            | <0.0010              | <0.0010      | <0.0010                    | <0.0010       |
| Count over DL |            |             | 1                   | 0                  | 0                    | 0            | 0                          | 0             |



Table: Results from regular monitoring of 37 organic chemicals and B, Se, F and SO<sub>4</sub> (Source: ALS Scandinavia AB)

|               | Dagsetning | Eign        | bens(b)flu<br>oranten<br>[µg/l] | bens(k)flu<br>oranten<br>[µg/l] | bens(a)p<br>yren<br>[µg/l] | dibenso(ah)<br>antracen<br>[µg/l] | benso(ghi)p<br>erylen [µg/l] | indeno(123<br>cd)pyren<br>[µg/l] | PAH,<br>summa 16<br>[µg/l] |
|---------------|------------|-------------|---------------------------------|---------------------------------|----------------------------|-----------------------------------|------------------------------|----------------------------------|----------------------------|
| 1             | 22.2.2011  | V-13        | <0.0040                         | <0.0020                         | <0.0020                    | <0.0020                           | <0.0030                      | <0.0030                          | <0.20                      |
| 2             | 16.8.2011  | VK-01       | <0.0040                         | <0.0020                         | <0.0020                    | <0.0020                           | <0.0030                      | <0.0030                          | <0.20                      |
| 3             | 28.8.2012  | VK-01       | <0.0040                         | <0.0020                         | <0.0020                    | <0.0020                           | <0.0030                      | <0.0030                          | <0.20                      |
| 4             | 19.2.2013  | V-13        | <0.0040                         | <0.0020                         | <0.0020                    | <0.0020                           | <0.0030                      | <0.0030                          | <0.20                      |
| 5             | 2.9.2013   | VK-01       | <0.0040                         | <0.0020                         | <0.0020                    | <0.0020                           | <0.0030                      | <0.0030                          | <0.20                      |
| 6             | 19.2.2014  | V-05        | <0.0040                         | <0.0020                         | <0.0020                    | <0.0020                           | <0.0030                      | <0.0030                          | <0.20                      |
| 7             | 13.8.2014  | VK-01       | <0.0040                         | <0.0020                         | <0.0020                    | <0.0020                           | <0.0030                      | <0.0030                          | <0.20                      |
| 8             | 21.4.2015  | V-13        | <0.0040                         | <0.0020                         | <0.0020                    | <0.0020                           | <0.0030                      | <0.0030                          | <0.20                      |
| 9             | 3.5.2016   | V-05        | <0.0040                         | <0.0020                         | <0.0020                    | <0.0020                           | <0.0030                      | <0.0030                          | <0.20                      |
| 10            | 24.10.2016 | VK-01       | <0.0040                         | <0.0020                         | <0.0020                    | <0.0020                           | <0.0030                      | <0.0030                          | <0.20                      |
| 11            | 8.5.2018   | V-01        | <0.0040                         | <0.0020                         | <0.0020                    | <0.0020                           | <0.0030                      | <0.0030                          | <0.20                      |
| 12            | 8.5.2018   | V-13        | <0.0040                         | <0.0020                         | <0.0020                    | <0.0020                           | <0.0030                      | <0.0030                          | <0.20                      |
| 13            | 8.5.2018   | VK-01       | <0.0040                         | <0.0020                         | <0.0020                    | <0.0020                           | <0.0030                      | <0.0030                          | <0.20                      |
| 14            | 17.9.2018  | VK-05       | <0.0040                         | <0.0020                         | <0.0020                    | <0.0020                           | <0.0030                      | <0.0030                          | <0.20                      |
| 15            | 17.9.2018  | V-14        | <0.0040                         | <0.0020                         | <0.0020                    | <0.0020                           | <0.0030                      | <0.0030                          | <0.20                      |
| 16            | 17.9.2018  | V-10        | <0.0040                         | <0.0020                         | <0.0020                    | <0.0020                           | <0.0030                      | <0.0030                          | <0.20                      |
| 17            | 6.5.2019   | V-3         | <0.0040                         | <0.0020                         | <0.0020                    | <0.0020                           | <0.0030                      | <0.0030                          | <0.20                      |
| 18            | 6.5.2019   | V-12        | <0.0040                         | <0.0020                         | <0.0020                    | <0.0020                           | <0.0030                      | <0.0030                          | <0.20                      |
| 19            | 6.5.2019   | VK-01       | <0.0040                         | <0.0020                         | <0.0020                    | <0.0020                           | <0.0030                      | <0.0030                          | <0.20                      |
| 20            | 16.10.2019 | VK-05       | <0.0040                         | <0.0020                         | <0.0020                    | <0.0020                           | <0.0030                      | <0.0030                          | <0.20                      |
| 21            | 16.10.2019 | Tank Myllul | <0.0040                         | <0.0020                         | <0.0020                    | <0.0020                           | <0.0030                      | <0.0030                          | <0.20                      |
| 22            | 16.10.2019 | V-10        | <0.0040                         | <0.0020                         | <0.0020                    | <0.0020                           | <0.0030                      | <0.0030                          | <0.20                      |
| 23            | 6.5.2020   | VK-01       | <0.0040                         | <0.0020                         | <0.0020                    | <0.0020                           | <0.0030                      | <0.0030                          | <0.20                      |
| 24            | 6.5.2020   | V-13        | <0.0040                         | <0.0020                         | <0.0020                    | <0.0020                           | <0.0030                      | <0.0030                          | <0.20                      |
| 25            | 6.5.2020   | V-05        | <0.0040                         | <0.0020                         | <0.0020                    | <0.0020                           | <0.0030                      | <0.0030                          | <0.20                      |
| 26            | 2.11.2020  | V-10        | <0.0040                         | <0.0020                         | <0.0020                    | <0.0020                           | <0.0030                      | <0.0030                          | <0.20                      |
| 27            | 2.11.2020  | V-12        | <0.0040                         | <0.0020                         | <0.0020                    | <0.0020                           | <0.0030                      | <0.0030                          | <0.20                      |
| 28            | 2.11.2020  | VK-05       | <0.0040                         | <0.0020                         | <0.0020                    | <0.0020                           | <0.0030                      | <0.0030                          | <0.20                      |
| 29            | 11.5.2021  | VK-01       | <0.0010                         | <0.0010                         | <0.0010                    | <0.0010                           | <0.0010                      | <0.0010                          | 0,0011                     |
| 30            | 11.5.2021  | V-04        | <0.0010                         | <0.0010                         | <0.0010                    | 0,0027                            | 0,0021                       | 0,0014                           | 0,0073                     |
| 31            | 11.5.2021  | V-19        | <0.0010                         | <0.0010                         | <0.0010                    | <0.0010                           | <0.0010                      | <0.0010                          | 0,0024                     |
| 32            | 25.5.2021  | DN Laxalón  | <0.0010                         | <0.0010                         | <0.0010                    | <0.0010                           | <0.0010                      | <0.0010                          | <0.00800                   |
| 33            | 19.10.2021 | V-3         | <0.0010                         | <0.0010                         | <0.0010                    | <0.0010                           | <0.0010                      | <0.0010                          | <0.00800                   |
| 34            | 19.10.2021 | V-13        | <0.0010                         | <0.0010                         | <0.0010                    | <0.0010                           | <0.0010                      | <0.0010                          | <0.00800                   |
| 35            | 19.10.2021 | VK-02       | <0.0010                         | <0.0010                         | <0.0010                    | <0.0010                           | <0.0010                      | <0.0010                          | 0,0011                     |
| 36            | 10.5.2022  | V-01        | <0.0010                         | <0.0010                         | <0.0010                    | <0.00060                          | <0.00030                     | <0.00030                         | <0.0101                    |
| 37            | 10.5.2022  | V-13        | <0.0010                         | <0.0010                         | <0.0010                    | <0.00060                          | <0.00030                     | <0.00030                         | <0.0101                    |
| 38            | 10.5.2022  | VK-1        | <0.0010                         | <0.0010                         | <0.0010                    | <0.00060                          | <0.00030                     | <0.00030                         | <0.0101                    |
| 39            | 18.10.2022 | V-23        | <0.0010                         | <0.0010                         | <0.0010                    | <0.00060                          | <0.00030                     | <0.00030                         | <0.0101                    |
| 40            | 18.10.2022 | V-5         | <0.0010                         | <0.0010                         | <0.0010                    | <0.00060                          | <0.00030                     | <0.00030                         | <0.0101                    |
| 41            | 18.10.2022 | VK-5        | <0.0010                         | <0.0010                         | <0.0010                    | <0.00060                          | <0.00030                     | <0.00030                         | <0.0101                    |
| 42            | 9.5.2023   | VK-1        | <0.0010                         | <0.0010                         | <0.0010                    | <0.00060                          | <0.00030                     | <0.00030                         | <0.0101                    |
| 43            | 9.5.2023   | V-12        | <0.0010                         | <0.0010                         | <0.0010                    | <0.00060                          | <0.00030                     | <0.00030                         | <0.0101                    |
| 44            | 9.5.2023   | V-01        | <0.0010                         | <0.0010                         | <0.0010                    | <0.00060                          | <0.00030                     | <0.00030                         | <0.0101                    |
| 45            | 17.10.2023 | VK-2        | <0.0010                         | <0.0010                         | <0.0010                    | <0.00060                          | <0.00030                     | <0.00030                         | <0.0101                    |
| 46            | 17.10.2023 | V-23        | <0.0010                         | <0.0010                         | <0.0010                    | <0.00060                          | <0.00030                     | <0.00030                         | <0.0101                    |
| 47            | 17.10.2023 | V-04        | <0.0010                         | <0.0010                         | <0.0010                    | <0.00060                          | <0.00030                     | <0.00030                         | <0.0101                    |
| Count over DL |            |             | 0                               | 0                               | 0                          | 1                                 | 1                            | 1                                | 4                          |



Table: Results from regular monitoring of 37 organic chemicals and B, Se, F and SO<sub>4</sub> (Source: ALS Scandinavia AB)

|               | Dagsetning | Eign        | PAH, summa cancerogena [µg/l] | PAH, summa övriga [µg/l] | triklorometan [µg/l] | tribrommetan [µg/l] | dibromklorometan [µg/l] | dibromklorometan [µg/l] | summa trihalometaller [µg/l] |
|---------------|------------|-------------|-------------------------------|--------------------------|----------------------|---------------------|-------------------------|-------------------------|------------------------------|
| 1             | 22.2.2011  | V-13        | <0.012                        | <0.19                    | <0.30                | <0.20               | <0.10                   | <0.10                   | <0.35                        |
| 2             | 16.8.2011  | VK-01       | <0.012                        | <0.19                    | <0.30                | <0.20               | <0.10                   | <0.10                   | <0.35                        |
| 3             | 28.8.2012  | VK-01       | <0.012                        | <0.19                    | <0.30                | <0.20               | <0.10                   | <0.10                   | <0.35                        |
| 4             | 19.2.2013  | V-13        | <0.012                        | <0.19                    | <0.30                | <0.20               | <0.10                   | <0.10                   | <0.35                        |
| 5             | 2.9.2013   | VK-01       | <0.012                        | <0.19                    | <0.30                | <0.20               | <0.10                   | <0.10                   | <0.35                        |
| 6             | 19.2.2014  | V-05        | <0.012                        | <0.19                    | <0.30                | <0.20               | <0.10                   | <0.10                   | <0.35                        |
| 7             | 13.8.2014  | VK-01       | <0.012                        | <0.20                    | <0.30                | <0.20               | <0.10                   | <0.10                   | <0.35                        |
| 8             | 21.4.2015  | V-13        | <0.012                        | <0.20                    | <0.30                | <0.20               | <0.10                   | <0.10                   | <0.35                        |
| 9             | 3.5.2016   | V-05        | <0.012                        | <0.20                    | <0.30                | <0.20               | <0.10                   | <0.10                   | <0.35                        |
| 10            | 24.10.2016 | VK-01       | <0.012                        | <0.20                    | <0.30                | <0.20               | <0.10                   | <0.10                   | <0.35                        |
| 11            | 8.5.2018   | V-01        | <0.012                        | <0.20                    | <0.30                | <0.20               | <0.10                   | <0.10                   | <0.35                        |
| 12            | 8.5.2018   | V-13        | <0.012                        | <0.20                    | <0.30                | <0.20               | <0.10                   | <0.10                   | <0.35                        |
| 13            | 8.5.2018   | VK-01       | <0.012                        | <0.20                    | <0.30                | <0.20               | <0.10                   | <0.10                   | <0.35                        |
| 14            | 17.9.2018  | VK-05       | <0.012                        | <0.20                    | <0.30                | <0.20               | <0.10                   | <0.10                   | <0.35                        |
| 15            | 17.9.2018  | V-14        | <0.012                        | <0.20                    | <0.30                | <0.20               | <0.10                   | <0.10                   | <0.35                        |
| 16            | 17.9.2018  | V-10        | <0.012                        | <0.20                    | <0.30                | <0.20               | <0.10                   | <0.10                   | <0.35                        |
| 17            | 6.5.2019   | V-3         | <0.012                        | <0.20                    | <0.30                | <0.20               | <0.10                   | <0.10                   | <0.350                       |
| 18            | 6.5.2019   | V-12        | <0.012                        | <0.20                    | <0.30                | <0.20               | <0.10                   | <0.10                   | <0.350                       |
| 19            | 6.5.2019   | VK-01       | <0.012                        | <0.20                    | <0.30                | <0.20               | <0.10                   | <0.10                   | <0.350                       |
| 20            | 16.10.2019 | VK-05       | <0.012                        | <0.20                    | <0.30                | <0.20               | <0.10                   | <0.10                   | <0.35                        |
| 21            | 16.10.2019 | Tank Myllul | <0.012                        | <0.20                    | <0.30                | <0.20               | <0.10                   | <0.10                   | <0.35                        |
| 22            | 16.10.2019 | V-10        | <0.012                        | <0.20                    | <0.30                | <0.20               | <0.10                   | <0.10                   | <0.35                        |
| 23            | 6.5.2020   | VK-01       | <0.012                        | <0.20                    | <0.30                | <0.20               | <0.10                   | <0.10                   | <0.35                        |
| 24            | 6.5.2020   | V-13        | <0.012                        | <0.20                    | <0.30                | <0.20               | <0.10                   | <0.10                   | <0.35                        |
| 25            | 6.5.2020   | V-05        | <0.012                        | <0.20                    | <0.30                | <0.20               | <0.10                   | <0.10                   | <0.35                        |
| 26            | 2.11.2020  | V-10        | <0.012                        | <0.20                    | <0.10                | <0.20               | <0.10                   | <0.10                   | <0.25                        |
| 27            | 2.11.2020  | V-12        | <0.012                        | <0.20                    | <0.30                | <0.20               | <0.10                   | <0.10                   | <0.35                        |
| 28            | 2.11.2020  | VK-05       | <0.012                        | <0.20                    | <0.30                | <0.20               | <0.10                   | <0.10                   | <0.35                        |
| 29            | 11.5.2021  | VK-01       | <0,0035                       | 0,0011                   | <0.10                | <0.20               | <0.10                   | <0.10                   | <0.250                       |
| 30            | 11.5.2021  | V-04        | 0,0041                        | 0,0032                   | <0.10                | <0.20               | <0.10                   | <0.10                   | <0.250                       |
| 31            | 11.5.2021  | V-19        | <0,0035                       | 0,0024                   | <0.10                | <0.20               | <0.10                   | <0.10                   | <0.250                       |
| 32            | 25.5.2021  | DN Laxalón  | <0,0035                       | <0,0045                  | <0.10                | <0.20               | <0.10                   | <0.10                   | <0.250                       |
| 33            | 19.10.2021 | V-3         | <0.00350                      | <0.00450                 | <0.020               | <0.20               | <0.10                   | <0.10                   | <0.250                       |
| 34            | 19.10.2021 | V-13        | <0.00350                      | <0.00450                 | <0.020               | <0.20               | <0.10                   | <0.10                   | <0.250                       |
| 35            | 19.10.2021 | VK-02       | <0.00350                      | <0.00450                 | <0.020               | <0.20               | <0.10                   | <0.10                   | <0.250                       |
| 36            | 10.5.2022  | V-01        | <0.00295                      | <0.00715                 | <0.10                | <0.20               | <0.10                   | <0.10                   | <0.250                       |
| 37            | 10.5.2022  | V-13        | <0.00295                      | <0.00715                 | <0.10                | <0.20               | <0.10                   | <0.10                   | <0.250                       |
| 38            | 10.5.2022  | VK-1        | <0.00295                      | <0.00715                 | <0.10                | <0.20               | <0.10                   | <0.10                   | <0.250                       |
| 39            | 18.10.2022 | V-23        | <0.00295                      | <0.00715                 | <0.10                | <0.20               | <0.10                   | <0.10                   | <0.250                       |
| 40            | 18.10.2022 | V-5         | <0.00295                      | <0.00715                 | <0.10                | 0,21                | <0.10                   | <0.10                   | 0,21                         |
| 41            | 18.10.2022 | VK-5        | <0.00295                      | <0.00715                 | <0.10                | <0.20               | <0.10                   | <0.10                   | <0.250                       |
| 42            | 9.5.2023   | VK-1        | <0.00295                      | <0.00715                 | <0.10                | <0.20               | <0.10                   | <0.10                   | <0.250                       |
| 43            | 9.5.2023   | V-12        | <0.00295                      | <0.00715                 | <0.10                | <0.20               | <0.10                   | <0.10                   | <0.250                       |
| 44            | 9.5.2023   | V-01        | <0.00295                      | <0.00715                 | <0.10                | <0.20               | <0.10                   | <0.10                   | <0.250                       |
| 45            | 17.10.2023 | VK-2        | <0.00295                      | <0.00715                 | <0.10                | <0.20               | <0.10                   | <0.10                   | <0.250                       |
| 46            | 17.10.2023 | V-23        | <0.00295                      | <0.00715                 | <0.10                | <0.20               | <0.10                   | <0.10                   | <0.250                       |
| 47            | 17.10.2023 | V-04        | <0.00295                      | <0.00715                 | <0.10                | <0.20               | <0.10                   | <0.10                   | <0.250                       |
| Count over DL |            |             | 1                             | 3                        | 0                    | 1                   | 0                       | 0                       | 1                            |
